# Supplementary material for: First-order and gradual phase transitions of ethane confined in MCM-41
Source: Royal Society of Chemistry journal article supplement (doi:10.1039/d2cp02530b), 2022-01-01
Supplement: d2cp02530b1.pdf [file d2cp02530b1.pdf]

## Electronic Supplementary Information

### First-Order and Gradual Phase Transitions of Ethane confined in MCM-41

Huan Yang,<sup>a</sup> Morteza Dejam,<sup>a\*</sup> Sugata P. Tan,<sup>c</sup> Hertanto Adidharma<sup>a,b\*</sup>

<sup>a</sup>Department of Petroleum Engineering, College of Engineering and Applied Science, University of Wyoming, 1000 E. University Avenue, Laramie, WY 82071-2000, USA

<sup>b</sup>Department of Chemical Engineering, College of Engineering and Applied Science, University of Wyoming, 1000 E. University Avenue, Laramie, WY 82071-2000, USA

<sup>c</sup>Planetary Science Institute, Tucson, Arizona 85719-2395, USA

\*Email: [mdejam@uwyo.edu](mailto:mdejam@uwyo.edu)

\*Email: [adidharm@uwyo.edu](mailto:adidharm@uwyo.edu)

## Table of Contents

|                                                        |    |
|--------------------------------------------------------|----|
| Experimental data of capillary condensation .....      | S1 |
| The uncertainties of capillary-condensation data ..... | S2 |
| Procedure of uncertainty determination for PCP .....   | S2 |
| References .....                                       | S3 |

## Experimental data of capillary condensation

**Table S1. Experimental data of capillary condensation of ethane in MCM-41.**

| 92 mg MCM-41 |           |         | 150 mg MCM-41 |           |         | 210 mg MCM-41 |           |         |
|--------------|-----------|---------|---------------|-----------|---------|---------------|-----------|---------|
| $T$ , K      | $P$ , bar | $h$ , J | $T$ , K       | $P$ , bar | $h$ , J | $T$ , K       | $P$ , bar | $h$ , J |
| 249.1        | 6.58      | 0.262   | 266.8         | 11.24     | 0.133   | 258.6         | 8.94      | 0.354   |
| 234.4        | 3.85      | 0.483   | 256.2         | 8.15      | 0.320   | 251.0         | 6.95      | 0.676   |
| 206.3        | 1.14      | 0.909   | 249.8         | 6.65      | 0.443   | 239.1         | 4.62      | 1.014   |
|              |           |         | 240.5         | 4.85      | 0.597   | 224.4         | 2.62      | 1.531   |
|              |           |         | 227.3         | 2.94      | 0.902   | 208.3         | 1.28      | 2.052   |
|              |           |         | 212.2         | 1.52      | 1.265   |               |           |         |

## The uncertainties of capillary-condensation data

With the same procedure as that used in our previous work<sup>1</sup> for determining the uncertainties of capillary-condensation of methane in MCM-41 and SBA-15, we use the bulk condensation of ethane along with the melting points of standard substances from literature to derive the uncertainties of measurements in this work. More details can be referred to the Supporting Information in our previous work. We define the temperature correction as

$$\Delta T_{corr} = T - T_{exp} \quad (S1)$$

where  $T$  is the temperature obtained from literature ('true' temperature) and  $T_{exp}$  is the measured temperature. The temperature correction data obtained are statistically averaged to obtain the mean temperature correction ( $\Delta T_{corr, mean} = -0.320$  K) and standard deviation ( $\sigma = 0.237$  K  $\approx 0.2$  K), as shown in Figure S2. The mean temperature correction is then applied to all temperature measurements in this work, and the standard deviation is the uncertainty of the measurements. The corrected temperature is then given by

$$T_{corr} = T_{exp} + \Delta T_{corr, mean} \quad (S2)$$

with an uncertainty of  $\pm 0.2$  K.

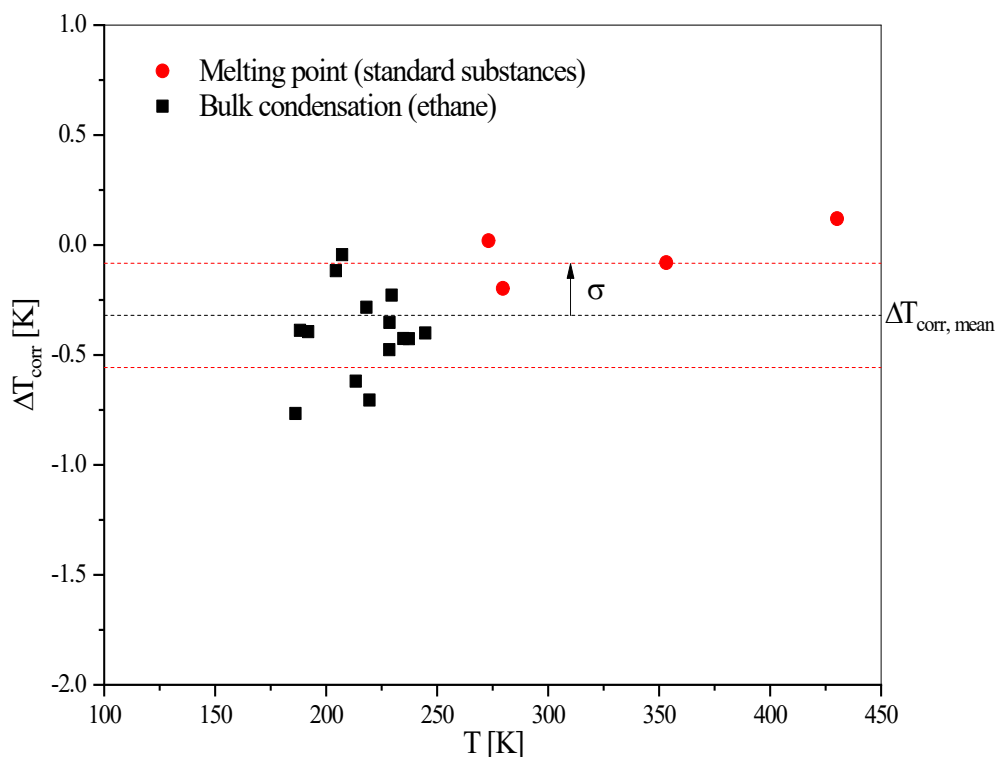

**Figure S2. The correction of temperatures for the melting points of standard substances during calibration and bulk ethane condensation during capillary condensation measurements.**

## Procedure of uncertainty determination for PCP

The procedure to determine the uncertainties of PCP is the same as that adopted in our previous work.<sup>1</sup> The results are given below:

**Table S2. Uncertainty determination for  $T_{Cp}$  of ethane in MCM-41.**

| Adsorbent amount, mg                                  | Intercept | Standard error | Intercept + Standard error | Intercept - Standard error | Minimum, K                            | Maximum, K |
|-------------------------------------------------------|-----------|----------------|----------------------------|----------------------------|---------------------------------------|------------|
| 92                                                    | 0.00365   | 1.70E-05       | 3.67E-03                   | 3.63E-03                   | 272.705                               | 275.252    |
| 150                                                   | 0.00363   | 4.82E-06       | 3.63E-03                   | 3.63E-03                   | 275.116                               | 275.849    |
| 210                                                   | 0.00364   | 2.08E-05       | 3.66E-03                   | 3.62E-03                   | 273.164                               | 276.305    |
| Mean                                                  |           |                |                            |                            | 273.662                               | 275.802    |
| $T_{Cp}$ derived directly from three-line approach, K |           |                |                            |                            | 275.000                               |            |
| $T_{Cp}$ with uncertainty, K                          |           |                |                            |                            | 275.0 <sup>+0.8</sup> <sub>-1.3</sub> |            |

**Table S3. Uncertainty determination for  $P_{Cp}$  of ethane in MCM-41.**

| Adsorbent amount, mg                                    | Intercept | Standard error | Intercept + Standard error | Intercept - Standard error | Minimum, bar                         | Maximum, bar |
|---------------------------------------------------------|-----------|----------------|----------------------------|----------------------------|--------------------------------------|--------------|
| 92                                                      | 2.64966   | 3.12E-02       | 2.68E+00                   | 2.62E+00                   | 13.715                               | 14.598       |
| 150                                                     | 2.66038   | 9.46E-03       | 2.67E+00                   | 2.65E+00                   | 14.167                               | 14.438       |
| 210                                                     | 2.66672   | 4.22E-02       | 2.71E+00                   | 2.62E+00                   | 13.798                               | 15.013       |
| Mean                                                    |           |                |                            |                            | 13.893                               | 14.683       |
| $P_{Cp}$ derived directly from three-line approach, bar |           |                |                            |                            | 14.319                               |              |
| $P_{Cp}$ with uncertainty, bar                          |           |                |                            |                            | 14.3 <sup>+0.4</sup> <sub>-0.4</sub> |              |

**References**

1. Yang, H.; Jayaatmaja, K.; Dejam, M.; Tan, S. P.; Adidharma, H. Phase transition and criticality of methane confined in nanopores. *Langmuir* **2022**, 38, 2046-2054.
